# Supplementary material
Source: Research Square preprint supplement (doi:10.21203/rs.3.rs-8994993/v1)
Supplement: Supplementary file 1 [file ca78b4e2bb40e0b47b874906.docx]

**Annex: Research Instrument (Full Questionnaire)**

This instrument was administered digitally during January and February 2026. All rating questions use an 11-point Likert-type scale, where **0** means "Not at all/Strongly Disagree" and **10** means "Strongly / Strongly Agree".

**1. Informed Consent**

Thank you for participating in this study. Your answers will be anonymous and confidential. You can leave the survey at any time. There are no right or wrong answers; We are only interested in your opinion. By continuing with the survey, you confirm that you agree to participate voluntarily.

**2. Demographics**

- **2.1. Age:** (Open-ended numerical answer)
- **2.2. Gender:** [Man] [Woman] [Non-binary/other identity] [I prefer not say]
- **2.3. Educational level:**
  - a. Compulsory education (Primary / ESO)
  - b. Baccalaureate or Training Cycles
  - c. Bachelor's degree studies
  - d. Master's or Doctorate
  - e. Other
- **2.4. Country and region of residence:** (Open-ended response)

**3. Artistic Experience**

- **3.1. What is your experience in the artistic field?**
  - a. None (I have never studied or practiced art on a regular basis)
  - b. Amateur (I paint, design or create art in a non-professional way)
  - c. Professional (I work or have worked in the artistic field)

**4. Knowledge and Use of AI**

- **4.1.** On a scale of 0 to 10, how would you rate your theoretical knowledge of AI?
- **4.2. How often do you use generative AI tools to create images or art (e.g., Midjourney, DALL· E)?**
  - a. Never/Rarely
  - b. Less than 1 time per month
  - c. 1–3 times a month
  - d. 1–2 times a week
  - e. Almost every day or daily

**5. Perception of authenticity (scale 0-10)**

- **5.1.** How would you assess the authenticity of a work created by AI?
- **5.2.** How would you assess the authenticity of a work created by a human?
- **5.3.** To what extent do you think knowing that a work has been generated by AI would alter your perception of authenticity after viewing it?

**6. Perception of Aura and Semi-Aura**

*Before answering this section, the participants read the following definition:*

**Definitions of work:** Walter Benjamin (1936) defines "**aura"** as the unique and unrepeatable quality of a work of art in its original context. In this study, we understand aura as the subjective sensation of originality and uniqueness that makes a work perceived as unrepeatable. We also explore the concept of **"semi-aura".** This term refers to the possibility that a work generated by artificial intelligence may retain some degree of uniqueness or originality, especially when it reflects human intent or hybrid processes.

*Degree of agreement (Scale 0-10):*

- **6.1.** A work created by a human being conveys a sense of originality and uniqueness (aura).
- **6.2.** A work created by AI can convey this sense of originality and uniqueness.
- **6.3.** AI-generated works, even if they do not have the same aura as human ones, retain a certain degree of it.
- **6.4.** When an AI-generated work clearly reflects the intent or "prompting" of a human creator, I perceive it as more authentic.
- **6.5.** A hybrid work (created jointly by human and AI) may have a different artistic value and aura than an AI-generated work.
- **6.6.** The use of AI as a creative tool does not necessarily remove the aura of the work, but rather transforms it.

**7. Acceptance and Future of AI-Generated Art (Scale 0-10)**

- **7.1.** To what extent do you think AI-generated art will become more important than human art in the future?
- **7.2.** To what extent do you agree with the statement: "Artists will have to adapt to AI tools to remain relevant"?
